# Supplementary material for: In vitro Study of Lactobacillus paracasei CNCM I-1518 in Healthy and Clostridioides difficile Colonized Elderly Gut Microbiota
Source: PubMed Central journal article supplement (PMC6914822; doi:10.3389/fnut.2019.00184), 2019-12-10
Supplement: Image_1.pdf [file Image_1.pdf]

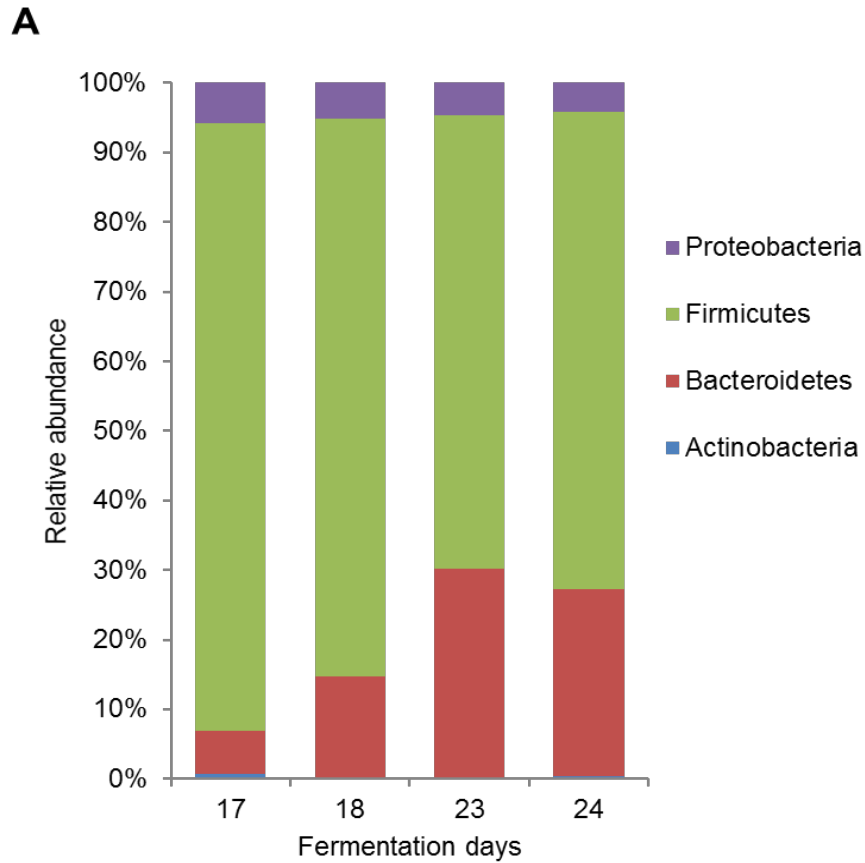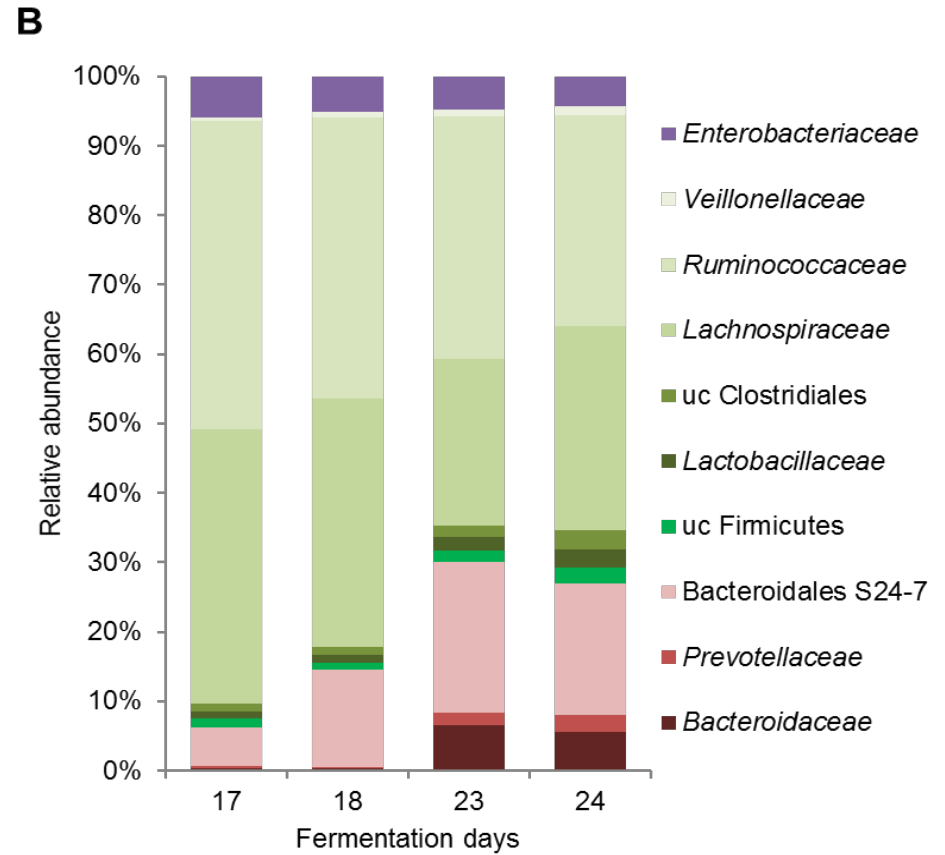

**Figure S 1** Composition of fermentation effluent samples in PC\_CR of model 1 assessed with 16S rRNA gene amplicon sequencing. **(A)** Phylum level **(B)** family level; uc, unclassified
