# Supplementary material for: In vitro Study of Lactobacillus paracasei CNCM I-1518 in Healthy and Clostridioides difficile Colonized Elderly Gut Microbiota
Source: PubMed Central journal article supplement (PMC6914822; doi:10.3389/fnut.2019.00184), 2019-12-10
Supplement: Image_2.pdf [file Image_2.pdf]

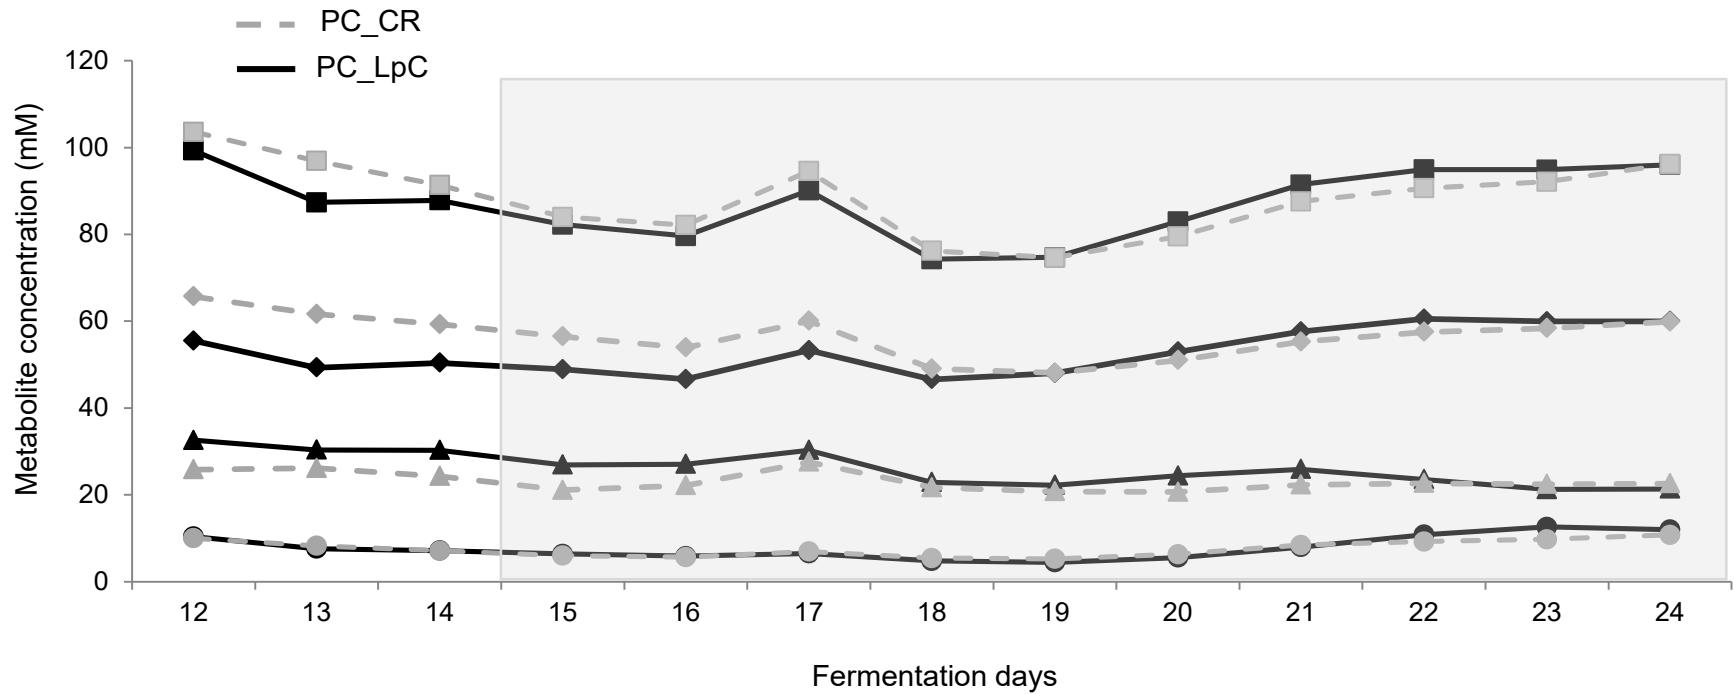

**Figure S 2** Metabolite concentrations in PC\_LpC and PC\_CR of colonic model 1 assessed with HPLC-RI. *L. paracasei* was added twice daily to PC\_LpC starting from day 15. Total metabolites (squares), acetate (diamonds), butyrate (triangles) and propionate (circles).
